# Supplementary material
Source: PubMed Central journal article supplement (PMC2798004)
Supplement: NIHMS114312-supplement-Supp.pdf [file NIHMS114312-supplement-Supp.pdf]

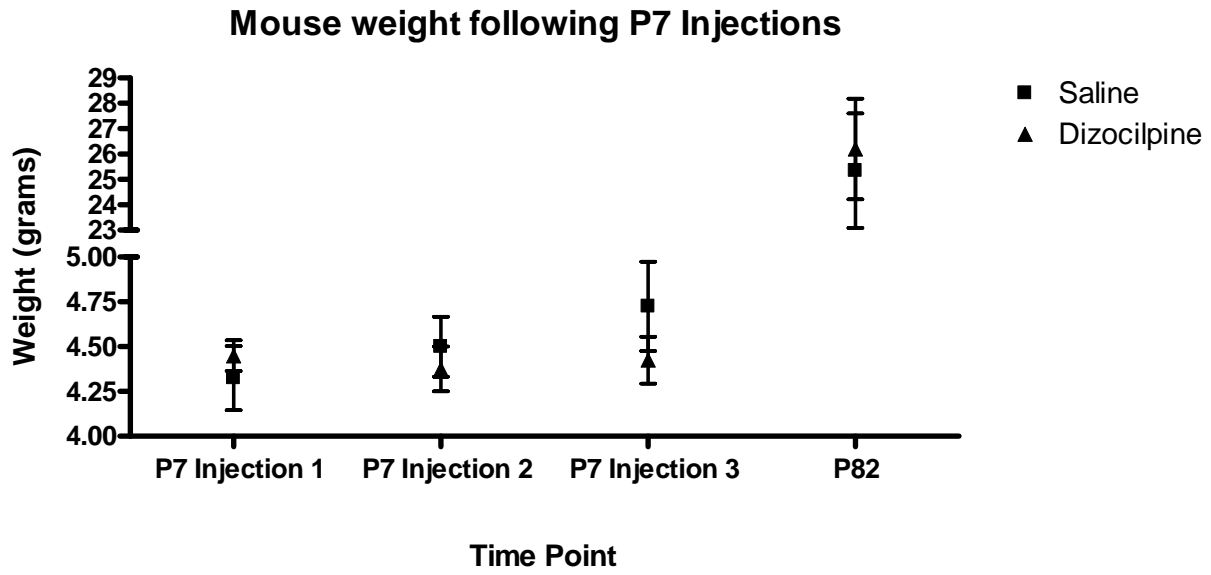

**Supplemental Figure 1:** Mouse weight following saline and dizocilpine injections. Mice were injected on post-natal day seven (P7) as described previously at 0h (P7 Injection 1), 8h (P7 Injection 2), and 16h (P7 Injection 3). There was no significant difference in weight due to dizocilpine treatment during the injection period and then in adulthood ( $F_{1,21} = 0.02, p = 0.89$ ). Dizocilpine may have caused a slight reduction in weight during the injection period; however, this did not reach statistical significance.

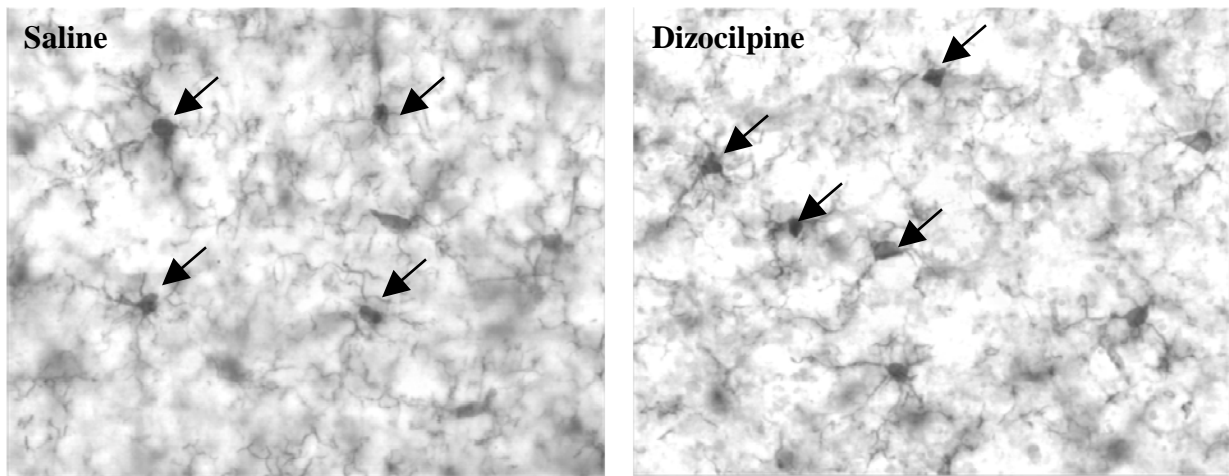

**Supplemental Figure 2:** Microglial activation using Iba-1 staining. Sections from adult mice (P82) treated previously on post-natal day seven as described previously were assessed for microglial activation. P82 mice treated with either saline or dizocilpine on P7 both had microglia in the resting state, indicating no differences in microglial activation (arrows).
